# Supplementary material for: Combined transcriptional and metabolic analysis of the differences in salt tolerance responses of tillers in different rice varieties
Source: Research Square preprint supplement (doi:10.21203/rs.3.rs-8270222/v1), 2025-12-16
Supplement: Supplementary file 1 [file aae250b25ef2d4628919a1fc.docx]

| **Table S1. Primers used for qPCR in the study** | | | |
| --- | --- | --- | --- |
| **Gene ID** | **Gene name** | **Forward Primer (5' - 3')** | **Reverse Primer (5' - 3')** |
| Os07g0677100 | OsPOD | ATGGTTGCTCTCTCAGGTGC | CGTCGATGTTGGTCTCGTTG |
| Os10g0109600 | OsPOD | CTGAGATGAGGATGGGTGCC | GGAACCGTCACACCCATTGA |
| Os04g0423800 | OsPOD | GAAGCCGGACTTCACCCTG | ATTGTCGAACCGGAACTGGC |
| Os11g0155500 | OsCAT8 | CCCTACGACGCGATAGACAC | TACCTGGCCTGACCTAGCAT |
| Os06g0539400 | OsCAT6 | GATGGCATGCATCGCTTGTT | ACGCGCAAAACAGAATCAGC |
| Os01g0294700 | OsPOD | GACTGCTTCGTCAGGGGTTG | CTTCTCCGGGTGTGGGTTC |
| Os02g0115700 | OsCATA1 | AAGCTGTTCGTCCAGGTGAT | AAGAAGTTGTCGACGTTGCG |

**Table S2. Statistics of sequencing data evaluation of rice tillering node samples**

| **Sample** | **Reads** | **Bases (bp)** | **Q20 (%)** | **Q30 (%)** | **GC (%)** | **N(ppm)** |
| --- | --- | --- | --- | --- | --- | --- |
| 9_CKI | 44879446 | 6731916900 | 98.52 | 95.56 | 48.14 | 14.83 |
| 9_CK2 | 44917022 | 6737553300 | 98.52 | 95.56 | 48.09 | 14.85 |
| 9_CK3 | 42935798 | 6440369700 | 98.52 | 95.51 | 48.14 | 15.16 |
| CMG_CKI | 51802544 | 7770381600 | 98.39 | 95.28 | 47.99 | 14.55 |
| CMG_CK2 | 39850290 | 5977543500 | 98.54 | 95.62 | 47.92 | 14.66 |
| CMG_CK3 | 39352788 | 5902918200 | 98.40 | 95.34 | 47.79 | 15.35 |
| 9_S1 | 37421954 | 5613293100 | 98.41 | 95.37 | 47.99 | 15.19 |
| 9_S2 | 46493810 | 6974071500 | 98.47 | 95.46 | 48.02 | 15.01 |
| 9_S3 | 55433410 | 8315011500 | 98.48 | 95.46 | 48.16 | 14.97 |
| CMG_S1 | 49094452 | 7364167800 | 98.48 | 95.44 | 47.58 | 14.99 |
| CMG_S2 | 52388438 | 7858265700 | 98.58 | 95.71 | 47.49 | 14.57 |
| CMG_S3 | 42259308 | 6338896200 | 98.41 | 95.31 | 47.64 | 15.03 |

| **Table S3. GO enrichment analysis of rice tillering node** | | | | | | | | |
| --- | --- | --- | --- | --- | --- | --- | --- | --- |
| 9311 0 Vs 9311 S in tillering node | | |  |  |  |  |  |  |
| Category | term | ontology | DEInCat | InCat | over_represented_pvalue | FDR | Up | Down |
| GO:0003700 | sequence-specific DNA binding transcription factor activity | MF | 51 | 995 | 0.00011541 | 0.037056621 | [25](9CK-VS-9S/9CK-VS-9S.GO_0003700_Ups.xlsx) | [26](9CK-VS-9S/9CK-VS-9S.GO_0003700_Down.xlsx) |
| GO:0004568 | chitinase activity | MF | 16 | 46 | 1.13832E-13 | 3.58343E-10 | [16](9CK-VS-9S/9CK-VS-9S.GO_0004568_Ups.xlsx) | [0](9CK-VS-9S/9CK-VS-9S.GO_0004568_Down.xlsx) |
| GO:0016168 | chlorophyll binding | MF | 11 | 28 | 1.54003E-10 | 2.42401E-07 | [0](9CK-VS-9S/9CK-VS-9S.GO_0016168_Ups.xlsx) | [11](9CK-VS-9S/9CK-VS-9S.GO_0016168_Down.xlsx) |
| GO:0042973 | glucan endo-1,3-beta-D-glucosidase activity | MF | 9 | 64 | 0.000117715 | 0.037056621 | [6](9CK-VS-9S/9CK-VS-9S.GO_0042973_Ups.xlsx) | [3](9CK-VS-9S/9CK-VS-9S.GO_0042973_Down.xlsx) |
| GO:0004867 | serine-type endopeptidase inhibitor activity | MF | 6 | 44 | 0.001458147 | 0.316568726 | [6](9CK-VS-9S/9CK-VS-9S.GO_0004867_Ups.xlsx) | [0](9CK-VS-9S/9CK-VS-9S.GO_0004867_Down.xlsx) |
| GO:0008061 | chitin binding | MF | 6 | 21 | 2.17751E-05 | 0.009792552 | [6](9CK-VS-9S/9CK-VS-9S.GO_0008061_Ups.xlsx) | [0](9CK-VS-9S/9CK-VS-9S.GO_0008061_Down.xlsx) |
| GO:0004869 | cysteine-type endopeptidase inhibitor activity | MF | 4 | 13 | 0.000330257 | 0.09040437 | [4](9CK-VS-9S/9CK-VS-9S.GO_0004869_Ups.xlsx) | [0](9CK-VS-9S/9CK-VS-9S.GO_0004869_Down.xlsx) |
| GO:0030410 | nicotianamine synthase activity | MF | 3 | 3 | 2.77005E-05 | 0.010258958 | [3](9CK-VS-9S/9CK-VS-9S.GO_0030410_Ups.xlsx) | [0](9CK-VS-9S/9CK-VS-9S.GO_0030410_Down.xlsx) |
| GO:0005576 | extracellular region | CC | 58 | 764 | 3.40634E-11 | 7.14877E-08 | [35](9CK-VS-9S/9CK-VS-9S.GO_0005576_Ups.xlsx) | [23](9CK-VS-9S/9CK-VS-9S.GO_0005576_Down.xlsx) |
| GO:0009535 | chloroplast thylakoid membrane | CC | 23 | 302 | 2.70053E-05 | 0.010258958 | [0](9CK-VS-9S/9CK-VS-9S.GO_0009535_Ups.xlsx) | [23](9CK-VS-9S/9CK-VS-9S.GO_0009535_Down.xlsx) |
| GO:0009522 | photosystem I | CC | 13 | 23 | 5.67288E-15 | 3.57165E-11 | [0](9CK-VS-9S/9CK-VS-9S.GO_0009522_Ups.xlsx) | [13](9CK-VS-9S/9CK-VS-9S.GO_0009522_Down.xlsx) |
| GO:0009523 | photosystem II | CC | 11 | 31 | 4.57231E-10 | 5.75746E-07 | [0](9CK-VS-9S/9CK-VS-9S.GO_0009523_Ups.xlsx) | [11](9CK-VS-9S/9CK-VS-9S.GO_0009523_Down.xlsx) |
| GO:0009538 | photosystem I reaction center | CC | 3 | 5 | 0.000213973 | 0.064151025 | [0](9CK-VS-9S/9CK-VS-9S.GO_0009538_Ups.xlsx) | [3](9CK-VS-9S/9CK-VS-9S.GO_0009538_Down.xlsx) |
| GO:0006952 | defense response | BP | 42 | 608 | 4.0583E-07 | 0.000232282 | [25](9CK-VS-9S/9CK-VS-9S.GO_0006952_Ups.xlsx) | [17](9CK-VS-9S/9CK-VS-9S.GO_0006952_Down.xlsx) |
| GO:0050832 | defense response to fungus | BP | 19 | 166 | 6.00691E-07 | 0.000315162 | [13](9CK-VS-9S/9CK-VS-9S.GO_0050832_Ups.xlsx) | [6](9CK-VS-9S/9CK-VS-9S.GO_0050832_Down.xlsx) |
| GO:0015979 | photosynthesis | BP | 12 | 104 | 4.5227E-05 | 0.015819387 | [1](9CK-VS-9S/9CK-VS-9S.GO_0015979_Ups.xlsx) | [11](9CK-VS-9S/9CK-VS-9S.GO_0015979_Down.xlsx) |
| GO:0018298 | protein-chromophore linkage | BP | 11 | 49 | 1.35596E-07 | 8.5371E-05 | [0](9CK-VS-9S/9CK-VS-9S.GO_0018298_Ups.xlsx) | [11](9CK-VS-9S/9CK-VS-9S.GO_0018298_Down.xlsx) |
| GO:0009416 | response to light stimulus | BP | 10 | 102 | 0.000924693 | 0.217567287 | [1](9CK-VS-9S/9CK-VS-9S.GO_0009416_Ups.xlsx) | [9](9CK-VS-9S/9CK-VS-9S.GO_0009416_Down.xlsx) |
| GO:0000272 | polysaccharide catabolic process | BP | 10 | 38 | 1.03468E-07 | 8.5371E-05 | [9](9CK-VS-9S/9CK-VS-9S.GO_0000272_Ups.xlsx) | [1](9CK-VS-9S/9CK-VS-9S.GO_0000272_Down.xlsx) |
| GO:0006032 | chitin catabolic process | BP | 9 | 30 | 1.31397E-07 | 8.5371E-05 | [9](9CK-VS-9S/9CK-VS-9S.GO_0006032_Ups.xlsx) | [0](9CK-VS-9S/9CK-VS-9S.GO_0006032_Down.xlsx) |

| **Table S4. GO enrichment analysis of rice** **tillering node** | | | | | | | | |
| --- | --- | --- | --- | --- | --- | --- | --- | --- |
| CMG 0 Vs CMG S in tillering node | | |  |  |  |  |  |  |
| Category | term | ontology | DEInCat | InCat | over_represented_pvalue | FDR | Up | Down |
| GO:0003700 | sequence-specific DNA binding transcription factor activity | MF | 55 | 995 | 1.8883E-09 | 1.18887E-05 | [19](MCK-VS-MS/MCK-VS-MS.GO_0003700_Ups.xlsx) | [36](MCK-VS-MS/MCK-VS-MS.GO_0003700_Down.xlsx) |
| GO:0043565 | sequence-specific DNA binding | MF | 33 | 607 | 6.49282E-06 | 0.010219702 | [7](MCK-VS-MS/MCK-VS-MS.GO_0043565_Ups.xlsx) | [26](MCK-VS-MS/MCK-VS-MS.GO_0043565_Down.xlsx) |
| GO:0044212 | transcription regulatory region DNA binding | MF | 16 | 226 | 7.75541E-05 | 0.046077294 | [4](MCK-VS-MS/MCK-VS-MS.GO_0044212_Ups.xlsx) | [12](MCK-VS-MS/MCK-VS-MS.GO_0044212_Down.xlsx) |
| GO:0004568 | chitinase activity | MF | 7 | 46 | 8.05035E-05 | 0.046077294 | [4](MCK-VS-MS/MCK-VS-MS.GO_0004568_Ups.xlsx) | [3](MCK-VS-MS/MCK-VS-MS.GO_0004568_Down.xlsx) |
| GO:0008061 | chitin binding | MF | 4 | 21 | 0.001167609 | 0.272269187 | [2](MCK-VS-MS/MCK-VS-MS.GO_0008061_Ups.xlsx) | [2](MCK-VS-MS/MCK-VS-MS.GO_0008061_Down.xlsx) |
| GO:0008889 | glycerophosphodiester phosphodiesterase activity | MF | 4 | 20 | 0.001067653 | 0.258536265 | [0](MCK-VS-MS/MCK-VS-MS.GO_0008889_Ups.xlsx) | [4](MCK-VS-MS/MCK-VS-MS.GO_0008889_Down.xlsx) |
| GO:0018685 | alkane 1-monooxygenase activity | MF | 4 | 13 | 0.000174542 | 0.091576328 | [1](MCK-VS-MS/MCK-VS-MS.GO_0018685_Ups.xlsx) | [3](MCK-VS-MS/MCK-VS-MS.GO_0018685_Down.xlsx) |
| GO:0052692 | raffinose alpha-galactosidase activity | MF | 3 | 9 | 0.000963814 | 0.243274059 | [3](MCK-VS-MS/MCK-VS-MS.GO_0052692_Ups.xlsx) | [0](MCK-VS-MS/MCK-VS-MS.GO_0052692_Down.xlsx) |
| GO:0048046 | apoplast | CC | 18 | 338 | 0.000965987 | 0.243274059 | [12](MCK-VS-MS/MCK-VS-MS.GO_0048046_Ups.xlsx) | [6](MCK-VS-MS/MCK-VS-MS.GO_0048046_Down.xlsx) |
| GO:0005615 | extracellular space | CC | 9 | 104 | 0.000674604 | 0.203096546 | [4](MCK-VS-MS/MCK-VS-MS.GO_0005615_Ups.xlsx) | [5](MCK-VS-MS/MCK-VS-MS.GO_0005615_Down.xlsx) |
| GO:0009737 | response to abscisic acid | BP | 19 | 291 | 5.67622E-05 | 0.039708325 | [5](MCK-VS-MS/MCK-VS-MS.GO_0009737_Ups.xlsx) | [14](MCK-VS-MS/MCK-VS-MS.GO_0009737_Down.xlsx) |
| GO:0009414 | response to water deprivation | BP | 17 | 235 | 3.70107E-05 | 0.038836549 | [7](MCK-VS-MS/MCK-VS-MS.GO_0009414_Ups.xlsx) | [10](MCK-VS-MS/MCK-VS-MS.GO_0009414_Down.xlsx) |
| GO:0050832 | defense response to fungus | BP | 12 | 166 | 0.000523447 | 0.203096546 | [4](MCK-VS-MS/MCK-VS-MS.GO_0050832_Ups.xlsx) | [8](MCK-VS-MS/MCK-VS-MS.GO_0050832_Down.xlsx) |
| GO:0009751 | response to salicylic acid | BP | 12 | 111 | 1.07348E-05 | 0.013517204 | [1](MCK-VS-MS/MCK-VS-MS.GO_0009751_Ups.xlsx) | [11](MCK-VS-MS/MCK-VS-MS.GO_0009751_Down.xlsx) |
| GO:0010200 | response to chitin | BP | 12 | 79 | 2.53543E-07 | 0.000798155 | [0](MCK-VS-MS/MCK-VS-MS.GO_0010200_Ups.xlsx) | [12](MCK-VS-MS/MCK-VS-MS.GO_0010200_Down.xlsx) |
| GO:0009873 | ethylene-activated signaling pathway | BP | 11 | 148 | 0.000671091 | 0.203096546 | [5](MCK-VS-MS/MCK-VS-MS.GO_0009873_Ups.xlsx) | [6](MCK-VS-MS/MCK-VS-MS.GO_0009873_Down.xlsx) |
| GO:0009611 | response to wounding | BP | 10 | 126 | 0.000720044 | 0.206063533 | [3](MCK-VS-MS/MCK-VS-MS.GO_0009611_Ups.xlsx) | [7](MCK-VS-MS/MCK-VS-MS.GO_0009611_Down.xlsx) |
| GO:0009617 | response to bacterium | BP | 9 | 73 | 4.62645E-05 | 0.039086259 | [1](MCK-VS-MS/MCK-VS-MS.GO_0009617_Ups.xlsx) | [8](MCK-VS-MS/MCK-VS-MS.GO_0009617_Down.xlsx) |
| GO:0009753 | response to jasmonic acid | BP | 8 | 79 | 0.000490759 | 0.203096546 | [2](MCK-VS-MS/MCK-VS-MS.GO_0009753_Ups.xlsx) | [6](MCK-VS-MS/MCK-VS-MS.GO_0009753_Down.xlsx) |
| GO:2000022 | regulation of jasmonic acid mediated signaling pathway | BP | 7 | 30 | 4.48276E-06 | 0.009407824 | [0](MCK-VS-MS/MCK-VS-MS.GO_2000022_Ups.xlsx) | [7](MCK-VS-MS/MCK-VS-MS.GO_2000022_Down.xlsx) |

| **Table S5. Significant KEGG analysis of DEGs in rice tillering node** | | | | | | | | | |
| --- | --- | --- | --- | --- | --- | --- | --- | --- | --- |
| 9311 0 Vs 9311 S in tillering node | | |  | |  | |  |  |  |
| **Pathway ID** | **Pathway** | **Level1** | **Level2** | **DEGs with pathway annotation** | | **Pvalue** | | **Up** | **Down** |
| ko00520 | Amino sugar and nucleotide sugar metabolism | Metabolism | Carbohydrate metabolism | | 15(7.85%) | | 0.000256552 | [15](9CK-VS-9S/9CK-VS-9S.ko00520_Ups.xlsx) | [0](9CK-VS-9S/9CK-VS-9S.ko00520_Down.xlsx) |
| ko00940 | Phenylpropanoid biosynthesis | Metabolism | Biosynthesis of other secondary metabolites | | 16(8.38%) | | 0.000880703 | [6](9CK-VS-9S/9CK-VS-9S.ko00940_Ups.xlsx) | [10](9CK-VS-9S/9CK-VS-9S.ko00940_Down.xlsx) |
| ko00430 | Taurine and hypotaurine metabolism | Metabolism | Metabolism of other amino acids | | 4(2.09%) | | 0.00104674 | [2](9CK-VS-9S/9CK-VS-9S.ko00430_Ups.xlsx) | [2](9CK-VS-9S/9CK-VS-9S.ko00430_Down.xlsx) |
| ko01110 | Biosynthesis of secondary metabolites | Metabolism | Global and overview maps | | 69(36.13%) | | 0.001582628 | [32](9CK-VS-9S/9CK-VS-9S.ko01110_Ups.xlsx) | [37](9CK-VS-9S/9CK-VS-9S.ko01110_Down.xlsx) |
| ko00908 | Zeatin biosynthesis | Metabolism | Metabolism of terpenoids and polyketides | | 6(3.14%) | | 0.001075947 | [5](9CK-VS-9S/9CK-VS-9S.ko00908_Ups.xlsx) | [1](9CK-VS-9S/9CK-VS-9S.ko00908_Down.xlsx) |
| ko04016 | MAPK signaling pathway - plant | Environmental Information Processing | Signal transduction | | 11(5.76%) | | 0.001779053 | [8](9CK-VS-9S/9CK-VS-9S.ko04016_Ups.xlsx) | [3](9CK-VS-9S/9CK-VS-9S.ko04016_Down.xlsx) |
| ko00196 | Photosynthesis - antenna proteins | Metabolism | Energy metabolism | | 11(5.76%) | | 6.51804E-17 | [0](9CK-VS-9S/9CK-VS-9S.ko00196_Ups.xlsx) | [11](9CK-VS-9S/9CK-VS-9S.ko00196_Down.xlsx) |
| ko00195 | Photosynthesis | Metabolism | Energy metabolism | | 10(5.24%) | | 1.54755E-05 | [0](9CK-VS-9S/9CK-VS-9S.ko00195_Ups.xlsx) | [10](9CK-VS-9S/9CK-VS-9S.ko00195_Down.xlsx) |
| ko01100 | Metabolic pathways | Metabolism | Global and overview maps | | 135(70.68%) | | 5.97796E-12 | [65](9CK-VS-9S/9CK-VS-9S.ko01100_Ups.xlsx) | [70](9CK-VS-9S/9CK-VS-9S.ko01100_Down.xlsx) |

| **Table S6. Significant KEGG analysis of DEGs in rice tillering node** | | | | | | | | | |
| --- | --- | --- | --- | --- | --- | --- | --- | --- | --- |
| CMG 0 Vs CCMG S in tillering node | | |  |  | |  | |  |  |
| **Pathway ID** | **Pathway** | **Level1** | **Level2** | | **DEGs with pathway annotation** | | **Pvalue** | **Up** | **Down** |
| ko00543 | Exopolysaccharide biosynthesis | Metabolism | Glycan biosynthesis and metabolism | | 1(0.79%) | | 0.002619369 | [0](MCK-VS-MS/MCK-VS-MS.ko00543_Ups.xlsx) | [1](MCK-VS-MS/MCK-VS-MS.ko00543_Down.xlsx) |
| ko04016 | MAPK signaling pathway - plant | Environmental Information Processing | Signal transduction | | 10(7.87%) | | 0.000188272 | [5](MCK-VS-MS/MCK-VS-MS.ko04016_Ups.xlsx) | [5](MCK-VS-MS/MCK-VS-MS.ko04016_Down.xlsx) |
| ko00402 | Benzoxazinoid biosynthesis | Metabolism | Biosynthesis of other secondary metabolites | | 1(0.79%) | | 0.001588799 | [1](MCK-VS-MS/MCK-VS-MS.ko00402_Ups.xlsx) | [0](MCK-VS-MS/MCK-VS-MS.ko00402_Down.xlsx) |
| ko00073 | Cutin, suberine and wax biosynthesis | Metabolism | Lipid metabolism | | 4(3.15%) | | 0.000817123 | [2](MCK-VS-MS/MCK-VS-MS.ko00073_Ups.xlsx) | [2](MCK-VS-MS/MCK-VS-MS.ko00073_Down.xlsx) |
| ko00196 | Photosynthesis - antenna proteins | Metabolism | Energy metabolism | | 2(1.57%) | | 0.002104944 | [2](MCK-VS-MS/MCK-VS-MS.ko00196_Ups.xlsx) | [0](MCK-VS-MS/MCK-VS-MS.ko00196_Down.xlsx) |
| ko00564 | Glycerophospholipid metabolism | Metabolism | Lipid metabolism | | 7(5.51%) | | 0.005443732 | [2](MCK-VS-MS/MCK-VS-MS.ko00564_Ups.xlsx) | [5](MCK-VS-MS/MCK-VS-MS.ko00564_Down.xlsx) |
| ko04626 | Plant-pathogen interaction | Organismal Systems | Environmental adaptation | | 16(12.60%) | | 0.000431278 | [3](MCK-VS-MS/MCK-VS-MS.ko04626_Ups.xlsx) | [13](MCK-VS-MS/MCK-VS-MS.ko04626_Down.xlsx) |
| ko00940 | Phenylpropanoid biosynthesis | Metabolism | Biosynthesis of other secondary metabolites | | 17(13.39%) | | 1.16844E-06 | [11](MCK-VS-MS/MCK-VS-MS.ko00940_Ups.xlsx) | [6](MCK-VS-MS/MCK-VS-MS.ko00940_Down.xlsx) |

**Table S7. Identification of differentially expressed genes related to antioxidant enzymes in rice tillering under salt stress**

| **Name** | **log2FoldChange** | | **Descriptions** |
| --- | --- | --- | --- |
| **9311** | **CMG** |
| Os10g0109600 | 4.58862625302685 |  | Peroxidase (EC 1.11.1.7) |
| Os07g0677100 | 2.41426137921897 |  | Peroxidase |
| Os04g0423800 | 3.65167766403192 |  | Peroxidase (EC 1.11.1.7) |
| Os01g0963000 | 4.29456320069401 |  | Similar to Peroxidase BP 1 precursor |
| Os08g0113000 | 2.60254867763864 |  | Similar to Peroxidase 47 precursor (EC 1.11.1.7) (ATP32) |
| Os05g0135500 | -2.62622462155904 |  | Haem peroxidase family protein |
| Os03g0368900 | -1.78376898924225 |  | Haem peroxidase family protein |
| Os01g0294700 | -1.45978181652881 |  | Haem peroxidase%2C plant/fungal/bacterial family protein |
| Os07g0677600 | -1.23913362930683 |  | Similar to Cationic peroxidase |
| Os01g0378100 | -1.08334686639888 |  | Plant peroxidase domain containing protein |
| Os05g0499300 | -1.02935660142965 |  | Similar to Peroxidase (EC 1.11.1.7) |
| Os11g0155500 | 1.20216684609928 |  | OsCAT8 |
| Os06g0539400 | -1.1774562823955 |  | OsCAT6 |
| Os01g0294700 |  | 1.66657269533401 | OsPOD |
| Os07g0677600 |  | 1.28849423543771 | Similar to Cationic peroxidase |
| Os06g0547400 |  | 3.48463371995262 | Similar to Peroxidase P7 (EC 1.11.1.7) (TP7) |
| Os05g0135200 |  | 2.34489000435976 | Plant peroxidase domain containing protein |
| Os03g0339400 |  | 1.95198068555554 | Haem peroxidase%2C plant/fungal/bacterial family protein |
| Os01g0378100 |  | 1.61726589692584 | Plant peroxidase domain containing protein |
| Os04g0689000 |  | 1.61209594053684 | Similar to Peroxidase (EC 1.11.1.7) |
| Os04g0688200 |  | 1.5060398785173 | Similar to Peroxidase (EC 1.11.1.7) |
| Os03g0121300 |  | 1.44658952041155 | Similar to Peroxidase 1 |
| Os07g0694300 |  | 1.37988291275294 | Similar to Peroxidase |
| Os01g0962700 |  | -1.14436267711452 | Similar to Peroxidase 12 precursor (EC 1.11.1.7) (ATP4a) |
| Os02g0115700 |  | 1.11729887253567 | CATA1 |

| **Table S8. Statistics of the number of differential metabolites** |
| --- |

| **Comparison** | **Total** | **Up** | **Down** | **Total_DE** |
| --- | --- | --- | --- | --- |
| S-9 vs CK-9 | 8975 | 2339 | 2075 | 4414 |
| S-M vs CK-M | 8975 | 2421 | 1620 | 4041 |
